# Supplementary material for: Alteration of protein function by a silent polymorphism linked to tRNA abundance
Source: PLoS Biol. 2017 May 16;15(5):e2000779. doi: 10.1371/journal.pbio.2000779 (PMC5433685; doi:10.1371/journal.pbio.2000779)
Supplement: S1 Data — (XLSX) [file pbio.2000779.s014.xlsx]

## Sheet: Fig. 1A
Relative mRNA expression level in HeLa cells
	Wild-type	F508del	G1584A	G2280A	T2562G	T3339C	G3870A
	100	72	98	67	57	66	82
	100	65	69	102	119	86	68
	100	58	30.7786	90	85	111	92
	100	18		59	35	56	55
	100			47	160	58.4389	43.2269
	100			79.2784	63.5076
	100				157.462
Mean	100	53.25	65.9262	74.0464	96.7099	75.4878	68.0454
SD	3.75058e-05	24.1851	33.7159	20.3512	49.6953	23.0872	19.7148
SEM	1.41759e-05	12.0925	19.4659	8.30833	18.7831	10.3249	8.81674
P value (t test)		0.0012	0.8001	0.0108	0.8749	0.0274	0.003
Replicates #	7	4	3	6	7	5	5
Relative mRNA expression level in CFBE cells
	Wild-type	F508del	G1584A	G2280A	T2562G	T3339C	G3870A
	100	103	104	67	104	52	67
	100	121	71	47	55	28	35
	100	83.7987	114	11	125	43	40
	100	90.44	43	73	102	99	90
	100		103.168	72	102	61	68
	100		72.95	29	106	86	90
	100			42.3373	56	36	39
	100			63.07	77.3782	64.842	70.7107
	100				110.57	144.89	124.83
Mean	100	99.5597	84.6864	50.5509	93.1054	68.3036	69.3934
SD	4.67549e-05	16.3615	26.9692	22.361	24.6009	36.6746	29.3737
SEM	1.47852e-05	8.18077	11.0101	7.90582	8.20031	12.2249	9.79124
P value (t test)		0.9195	0.0864	< 0.0001	0.388	0.014	0.0043
Replicates #	9	4	6	8	9	9	9

## Sheet: Fig. 1B
Relative CFTR expression level in HeLa cells
	Wild-type	F508del	G1584A	G2280A	T2562G	T3339C	G3870A
	100	31	111.106	64	53.65	65	61
	100	34	89.2906	82	64.67	71	57
	100	31	130.573	94	98.76	103	83
	100	41.3062	99.7218	78.8227	69.6307	71.7531	73.533
	100	36.7161	86.5955	105.32	96.3017	61.779	108
	100			88	122	48.5088	90.1974
	100			58.5892	78.24		64.2861
	100			44.2721	78.68
	100				86.85
	100				14.8478
	100				75.8255
	100				84.3029
	100				78.747
	100				72.5258
Mean	99.9999	34.8045	103.457	76.8756	76.788	70.1735	76.7167
SD	0.000258219	4.34516	17.9773	20.0689	24.2805	18.1513	18.2587
SEM	5.851e-08	0.03604	0.09714	0.06298	0.05653	0.06371	0.05978
P value (t test)		0.0013	0.2995	0.0091	0.0321	0.0088	0.007
Replicates #	14	5	5	8	14	6	7
Relative CFTR expression level in CFBE cells
	Wild-type	F508del	G1584A	G2280A	T2562G	T3339C	G3870A
	99.999	37.0688	101.579	80.8909	56.5784	130.564	150.785
	100	39.2636	118.44	70.6413	70.1971	100.192	117.477
	100	63.0908	122.191	104.183	96.2399	90.3654	162.616
	100	54.2169	99.8738	106.748	102.84	123.004	120.602
	100		75.3393	109.692	67.1079	92.0271	77.574
	100		60.4978	83.2973	44.8757	78.344
	100.001				77.3627
Men	100	48.41	95.6092	91.8572	74.735	103.395	119.903
SD	0.000471146	12.4033	26.9589	15.7969	22.2261	19.7022	33.011
SEM	0.000148989	6.20165	12.0564	6.44906	8.40068	8.04341	13.4767
P value (t test)		0.0036	0.7342	0.2624	0.0238	0.6905	0.1997
Replicates #	7	4	6	6	7	6	5

## Sheet: Fig. 2B
Thermal agregation propensity analysis
		Temp. (°C)	Wild-type					T2562G				F508del
		37	100	100	100	100	100	100	100	100	100	100	100	100	100	100	100	100
		50	80.3756	85.3604		84.9805	84.1849	72.8626	90.3637	99.2084	101.334	56.7925	80.4233	121.492	108.097	95.1048	81.4065	122.031
		60	88.0394	74.4295	66.5388		45.3037	73.0129	83.1839	84.6742	86.7305	52.862	35.3725	80.5285	79.8503	41.2215	74.1322	22.21
		70	48.0451	67.8535	21.7462	42.5307	29.4647	63.5907	67.0613	66.8335	61.7596	19.6421	30.4499	21.5492	22.2493	9.45282	14.9863	4.68295
		80	13.7021	19.7583	0.262034		9.54436	54.7544	14.7069	34.9815	36.8183	15.4922	11.0451	-12.9375	5.18113	0.341316	13.0846	0.536542
		90	10.0291	7.96678	-0.402802	5.86463	1.44476	21.3928	4.3235	6.73433	14.9098	5.32052	5.6451	-2.49321	-0.117246	2.8894	2.36295	-0.428006
		100	15.0411	1.07127	-1.35208	5.94364	1.43004	6.03862	7.21352	10.1605	4.1039	1.44728	13.3156	-1.94243	-1.85461	3.44749	1.65301	-0.403711
Ta obtained from Boltzman fit
			Wild-type	T2562G	F508del
		Mean	66.59	73.1	60.87
		SD	4.882	2.164	3.784
		SEM	2.183	1.082	1.43
				P value (t test)
			Wild-type vs. T2562G	0.0439
			Wild-type vs. F508del	0.0444
			T2562G vs. F508del	0.0002
Thermal agregation propensity analysis for separate CFTR band B and C
		Temp. (°C)	Wild-type B-band				Wild-type C-band				T25652G B-band				T2562G C-band
		37	100	100	100	100	100	100	100	100	100	100	100	100	100	100	100	100
		50	91.4954	123.2	79.5311	81.697	78.5938	76.9968	88.2133	84.8022		91.1098	92.9599	98.5749	76.0512	89.1584	99.5825	104.288
		60	93.9982	103.321	77.8293		89.3718	62.9052	82.0038		75.2886	72.625	110.731	82.7884	76.8575	89.0751		88.9556
		70	61.9172	79.0456	36.5334	25.0778	39.2701	58.2927	44.4507	31.2316		65.5021	43.732	59.8893	63.1004	76.7412	84.063	64.8053
		80	29.6577	25.5856	19.6132		-8.82179	17.6963	25.4005	13.3109		15.2224	15.0859	26.9742	53.3451	15.7763	46.5038	40.3772
		90	10.1959	14.3541	9.37176	-0.316067	-11.9415	6.74711	7.00824	2.62702	17.1354	5.79591	-11.0014	12.2178	16.6933	3.84864	-0.353398	14.2446
		100	0	0.994502	10.1029	0.970554	0	0.837649	7.0371	2.04593	5.02084	7.76775	0.0738617	0	-1.75248	6.78155	3.48157	0
Ta obtained from Boltzman Sigmodial Fit
			Mean	SEM
		Wild-type band B	70.61	1.93054
		Wild-type band C	68.017	1.69863
		T2562G band B	71.19	1.43339
		T2562G band C	77.4161	1.90217
			P value (t Test)
		Wild-type vs. T2562G band B	0.8222
		Wild-type vs. F508del band C	0.0103

## Sheet: Fig. 2D
Trypsin susceptibility of CFTR band B and band C (probed with NBD1 specific antibody 660)
	Trypsin	Wild-type B-band			Wild-type C-band			T2562G B-band			T2562G C-band
	1e-06	100	100	100	100	100	100	100	100	100	100	100	100
	2e-05	89.5229	65.2242	58.8894	46.2562	43.3096	65.4924	76.6364	80.6102	69.0954	82.7058	78.808
	0.0001	84.3591	26.5967	27.4719	26.0945	11.114	36.7987	51.0802	71.2551	57.359	74.089	52.897	46.4952
	0.0002	59.0559	24.2353	25.381	9.33357	11.2845	22.52	42.5294	71.4503	34.6698	41.8807	43.1189	51.9505
	0.0005	54.8886	22.2796	6.60752	8.80933	2.7431	12.8199	29.7653	52.4601	9.41214	18.1663	20.8268	33.0242
	0.001	23.0855	16.8881	4.91654	0.914914	2.43901	7.58076	2.14735	16.2999	1.70926	1.85867	6.05891	4.92874
	0.002	23.7874	1.13509	2.97928	1.68628	1.89429	4.1641	-0.921974	11.8706	-1.66137	0.93122	7.76542	23.1318
	0.005	13.346	-2.01628	1.03845	2.66675	0.318575	-2.10313	-1.38118	2.86248	-1.40679	-0.614958	2.50725	-0.884297
	0.01	0	0	0	0	0	0	0	0	0	0	0	0
		P value (t test)
	Trypsin	Wild-type vs T2562G band B			Wild-type vs T2562G band C
	2e-05	0.6742			0.0495
	0.0001	0.5298			0.0413
	0.0002	0.4513			0.0038
	0.0005	0.8964			0.0431

## Sheet: Fig. 3B
Single-channel current amplitude (i) (pA)
	Wild-type	T2562G - wtl	T2562G -sc	T2562C
(i) (pA)	-0.74	-0.741023	-0.31152	-0.818448
	-0.788	-0.85339	-0.175286	-0.713961
	-0.71	-0.570708	-0.136404	-0.788453
	-0.767791	-0.792663	-0.223868	-0.786034
	-0.7	-0.725289	-0.242471	-0.730111
		-0.77561	-0.27346	-0.870672
		-0.7154		-0.835399
		-0.68488		-0.78502
		-0.844299		-0.824959
Mean	-0.74	-0.74	-0.23	-0.794784
SEM	0.01	0.03	0.03	0.0165856
P value (t test)		0.903622	0.00114	0.400408
Replicates #	5	9	6	9

## Sheet: Fig. 3C
Single-channel open probability (Po)
	Wild-type	T2562G - wtl	T2562G -sc	T2562C
Po	0.450697	0.405817	0.296	0.50646
	0.390759	0.454127	0.32014	0.555913
	0.448275	0.51734	0.221045	0.48424
	0.456045	0.57242	0.40427	0.411897
	0.516013	0.410115	0.28237	0.601082
	0.447944	0.384556	0.5115	0.451805
		0.47049		0.401745
		0.467475		0.496353
		0.450895		0.491419
Mean	0.451622	0.46	0.34	0.48899
SEM	0.0162231	0.02	0.04	0.0212031
P value (t test)		0.879621	0.047039	0.146562
Replicates #	6	9	6	9

## Sheet: Fig. 3D
mean burst duration (MBD., ms)
	Wild-type	T2562G - wtl	T2562G -sc	T2562C
MBD (ms)	113.344	103.696	ND	167.391
	103.061	144.478		121.999
	95.682	102.254		191.888
	111.131	155.346		107.971
	127.453	93.0495		86.752
	117.427	128.011
Mean	111.35	121.14		135.2
SEM	4.53	10.35		19.38
P value (t test)		0.46166		0.346533
Replicates #	6	6		5

## Sheet: Fig. 3E
Interburst interval (IBI)
	Wild-type	T2562G - wtl	T2562G -sc	T2562C
IBI (ms)	122.55	115.979	ND	130.751
	145.651	150.975		111.978
	97.9123	93.6112		98.7222
	119.151	96.3004		111.939
	103.932	110.108		95.3006
	132.661	99.3696
Mean	120.31	111.06		109.74
SEM	7.24	8.71		6.25
P value (t test)		0.210424		0.315857
Replicates #	6	6		5

## Sheet: Fig. 4B
Ribosome dwelling occupancy
Codon	Normalized codon frequency	Codon usage [frequency/1000]
AAA	0.378603	26.0516
AAC	1.20732	18.9309
AAG	0.704139	32.4558
AAT	0.882647	17.6498
ACA	0.856571	15.6459
ACC	1.22812	18.7433
ACG	1.54155	6.07032
ACT	1.12073	13.8274
AGA	0.794193	12.5711
AGC	0.930753	20.3529
AGG	1.35948	12.2388
AGT	0.739675	13.0179
ATA	0.584893	7.8153
ATC	0.664474	20.078
ATT	0.502902	16.3243
CAA	0.965583	13.1562
CAC	0.739559	15.4408
CAG	1.3322	35.4216
CAT	0.645427	11.4555
CCA	0.990445	17.9575
CCC	1.04642	20.7914
CCG	1.34841	7.56078
CCT	1.09666	18.5413
CGA	1.26823	6.28234
CGC	1.52621	10.6051
CGG	1.69373	11.7085
CGT	1.24389	4.59749
CTA	0.863202	7.36027
CTC	1.06312	19.4249
CTG	1.13309	39.7142
CTT	0.744688	13.7703
GAA	0.589204	31.4447
GAC	1.23801	25.4821
GAG	0.772877	41.1315
GAT	1.06748	22.8224
GCA	0.958715	16.5665
GCC	1.04245	28.5097
GCG	1.92167	7.81122
GCT	1.10613	18.894
GGA	1.21203	17.039
GGC	1.17084	22.7871
GGG	1.34345	16.6992
GGT	0.91852	10.9315
GTA	0.842262	7.36277
GTC	0.996262	14.2501
GTG	1.00588	27.7516
GTT	0.768321	11.3466
TAC	1.03829	14.749
TAT	0.837806	12.2656
TCA	1.00272	13.1436
TCC	1.20419	18.1239
TCG	1.80008	4.64277
TCT	1.20653	15.9918
TGC	1.0156	12.5579
TGG	1.24859	12.4495
TGT	0.856806	10.9284
TTA	0.592263	8.17235
TTC	0.72287	19.7115
TTG	0.868667	13.3235
TTT	0.523973	17.5489

## Sheet: Fig. 4C
Microarray analysis of the absolute tRNA concentration in HeLa cells
		Fluorescent signal values										tRNA fractions									tRNA fractions
tRNA	Cy3	2.25	1.125	0.566		Cy5	2.25	1.125	0.566		Cy3	2.25	1.125	0.566		Cy5	2.25	1.125	0.566		Mean	Std.Div.	SEM
GCT/C/A (Ala)		205.516	96.2185	72.3702			301.81	132.014	85.0179			0.177234	0.246896	0.353357			0.159924	0.17792	0.213908		0.22154	0.0717484	0.0119581
GCT/C/A/G (Ala)		702.654	204.857	125.074			1144.59	459.654	239.871			0.605956	0.525663	0.610688			0.606497	0.619493	0.603524		0.595304	0.0345772	0.00576287
CGT/C (Arg)		3018.08	960.636	526.04			4627.91	1989.1	1033.35			2.60273	2.46499	2.56846			2.45224	2.68078	2.59995		2.56153	0.0879857	0.0146643
CGG/A (Arg)		3852.79	1198.34	671.171			4184.05	1834.8	969.47			3.32258	3.07494	3.27708			2.21705	2.47282	2.43923		2.80062	0.480274	0.0800457
AGG (Arg)		3743.02	1093.27	555.48			3754.69	1755.84	921.243			3.22792	2.80533	2.7122			1.98954	2.36641	2.31788		2.56988	0.435983	0.0726638
AGA (Arg)		1958.9	794.502	288.099			1878.48	817.98	441.45			1.68932	2.03869	1.40668			0.995372	1.10242	1.1107		1.39053	0.40672	0.0677867
AAT/C (Asn)		5952.24	1767.43	919.234			5769.78	2597.95	1333.41			5.1331	4.53523	4.48828			3.0573	3.50135	3.35492		4.01169	0.819934	0.136656
GAT/C (Asp)		12301.2	4479.95	3452.14			14066.2	8273.29	4852.25			10.6083	11.4955	16.8555			7.45339	11.1502	12.2085		11.6286	3.04554	0.50759
TGT/TGC (Cys)		1691.05	594.313	309.061			3781.76	1861.15	1118.77			1.45833	1.52501	1.50903			2.00388	2.50833	2.81486		1.96991	0.579148	0.0965246
CAA/G (Gln)		2863.61	1016.38	613.363			6246.31	3371.26	2095.44			2.46952	2.60804	2.99482			3.3098	4.54357	5.27222		3.533	1.1289	0.188151
GAA/G (Glu)		5300.34	1627.63	1048.34			9477.82	5371.66	3020.51			4.57092	4.17648	5.11865			5.02212	7.23958	7.59973		5.62124	1.43774	0.239623
GAA (Glu)		6606.99	2111.12	1172.58			9804.06	5140.36	2973.91			5.69775	5.41712	5.72526			5.19499	6.92786	7.48249		6.07424	0.914357	0.152393
GGC/T/G (Gly)		1717.66	501.219	285.62			3192.4	1422.13	756.567			1.48128	1.28613	1.39457			1.69159	1.91666	1.90355		1.6123	0.266348	0.0443914
GGA (Gly)		2082.97	538.379	361.81			3718.42	1505.33	778.303			1.79632	1.38148	1.76658			1.97032	2.02879	1.95824		1.81696	0.237049	0.0395081
CAT/C (His)		553.273	149.109	135.124			833.572	332.761	174.585			0.477133	0.382614	0.659761			0.441694	0.448474	0.439264		0.474823	0.0956723	0.0159454
ATT/C (Ile)		847.012	234.885	151.33			1647.42	697.531	364.899			0.730448	0.602715	0.738885			0.872938	0.940088	0.918101		0.800529	0.131442	0.021907
ATA (Ile)		692.015	264.022	153.773			1088.92	453.196	239.386			0.596781	0.677481	0.750818			0.576998	0.610788	0.602305		0.635862	0.0658697	0.0109783
CTT/C/A (Leu)		801.267	230.338	111.24			1678.06	708.355	370.733			0.690998	0.591047	0.543146			0.889173	0.954676	0.932779		0.76697	0.181371	0.0302286
CTG (Leu)		619.069	174.531	105.328			1315.28	545.98	289.669			0.533873	0.447846	0.514276			0.696939	0.735838	0.728819		0.609598	0.125509	0.0209182
TTG (Leu)		1092.23	298.09	207.164			2105.18	847.142	437.162			0.941922	0.764897	1.0115			1.11549	1.14172	1.09992		1.01258	0.142294	0.0237157
TTA/G (Leu)		700.398	251.603	141.307			714.579	340.424	205.184			0.60401	0.645613	0.689951			0.378642	0.458802	0.516251		0.548878	0.118707	0.0197846
TTA/G (Leu)		169.83	52.7016	44.6736			532.364	255.086	153.171			0.146458	0.135232	0.218124			0.28209	0.343788	0.385384		0.251846	0.102998	0.0171663
AAG (Lys)		3290.9	1048.78	527.899			3924.65	1661.15	866.126			2.83801	2.69117	2.57753			2.0796	2.23879	2.17921		2.43405	0.309383	0.0515639
AAA (Lys)		5204.48	1591.91	728.872			5080.37	2154.27	1096.34			4.48825	4.08484	3.55881			2.69199	2.90339	2.75844		3.41429	0.753231	0.125539
AAA (Lys)		2481.32	726.156	363.526			3757.1	1582.54	795.672			2.13985	1.86331	1.77496			1.99081	2.13285	2.00194		1.98396	0.144966	0.024161
AAA (Lys)		2143.96	700.851	353.458			2544.21	1132.35	584.899			1.84891	1.79838	1.7258			1.34813	1.52611	1.47163		1.61983	0.200079	0.0333464
ATG (Meti)		2654.61	772.711	416.441			5071.62	2321.19	1296.39			2.28929	1.98277	2.03333			2.68736	3.12835	3.26177		2.56381	0.550545	0.0917575
ATG (Met)		618.796	196.964	127.332			1210.77	505.156	260.037			0.533639	0.505408	0.621716			0.641564	0.680818	0.654263		0.606235	0.0704178	0.0117363
TTT/C (Phe)		1187.02	317.018	222.19			2260.48	953.14	492.797			1.02366	0.813466	1.08487			1.19778	1.28458	1.2399		1.10738	0.173801	0.0289669
CCT/C/A/G (Pro)		8257.23	4890.5	2913.76			15438.5	9881.49	6481.06			7.12088	12.549	14.2268			8.18057	13.3176	16.3066		11.9503	3.57553	0.595922
TCG (Ser)		1745.69	592.994	288.271			1819.02	781.088	409.617			1.50545	1.52162	1.40752			0.963862	1.0527	1.03061		1.24696	0.257963	0.0429938
TCT/C/A (Ser)		3521.4	1073.48	596.388			3248.07	1431.24	740.33			3.03679	2.75456	2.91194			1.72109	1.92894	1.8627		2.36934	0.593155	0.0988592
AGT/C (Ser)		2328.49	748.486	360.635			2645.67	1140.69	576.597			2.00805	1.92061	1.76084			1.40189	1.53735	1.45074		1.67991	0.25389	0.0423149
ACT/C/G (Thr)		2040.71	810.389	411.817			4229.57	2124.45	1243.89			1.75987	2.07945	2.01075			2.24117	2.8632	3.12968		2.34736	0.532845	0.0888075
ACA (Thr)		2062.98	722.579	384.413			3433.18	1714.24	992.104			1.77908	1.85414	1.87695			1.81918	2.31034	2.49617		2.02264	0.30244	0.0504066
ACG (Thr)		95.955	72.635	42.5225			150.164	97.4635	77.6896			0.0827498	0.186381	0.207622			0.0795692	0.131355	0.19547		0.147191	0.0574365	0.00957274
ACG (Thr)		835.849	415.993	164.634			1041.06	532.584	330.367			0.720821	------	0.803845			0.551637	0.717783	0.831217		0.725061	0.109113	0.0181856
TGG (Trp)		1089.88	266.57	175.37			2323.23	977.285	479.304			0.939896	0.684019	0.856265			1.23103	1.31712	1.20595		1.03905	0.24953	0.0415883
TAT/C (Tyr)		4928.59	1648.13	927.303			8830.07	5038.72	3046.64			4.25033	4.22911	4.52767			4.67889	6.79087	7.66547		5.35706	1.48523	0.247538
GTT/C/G (Val)		1443.06	351.478	196.518			3365.29	1350.59	698.013			1.24447	0.90189	0.959523			1.7832	1.82024	1.75623		1.41093	0.428008	0.0713347
GTA (Val)		1159.58	389.712	204.808			1887.22	741.985	397.45			1	1	1			1	1	1		1	0	0
Replicates #	3

[truncated: 30 more sheets: Fig. 4D, Fig. 4F, Fig. 4G, Fig. 5B, Fig. 5C, Fig. 5E, Fig. 5G, Fig. 5F, Fig. 5H, S1E Fig., S2B Fig., S2D Fig., S2F Fig., S2G Fig., S2I Fig., S2J Fig., S3B Fig., S5B Fig., S5C Fig., S6D Fig. …]
